# Supplementary material
Source: PubMed Central journal article supplement (PMC5752908)
Supplement: ajtr0009-5585-f6.pdf [file ajtr0009-5585-f6.pdf]

# Qiliqiangxin in cardiac remodeling

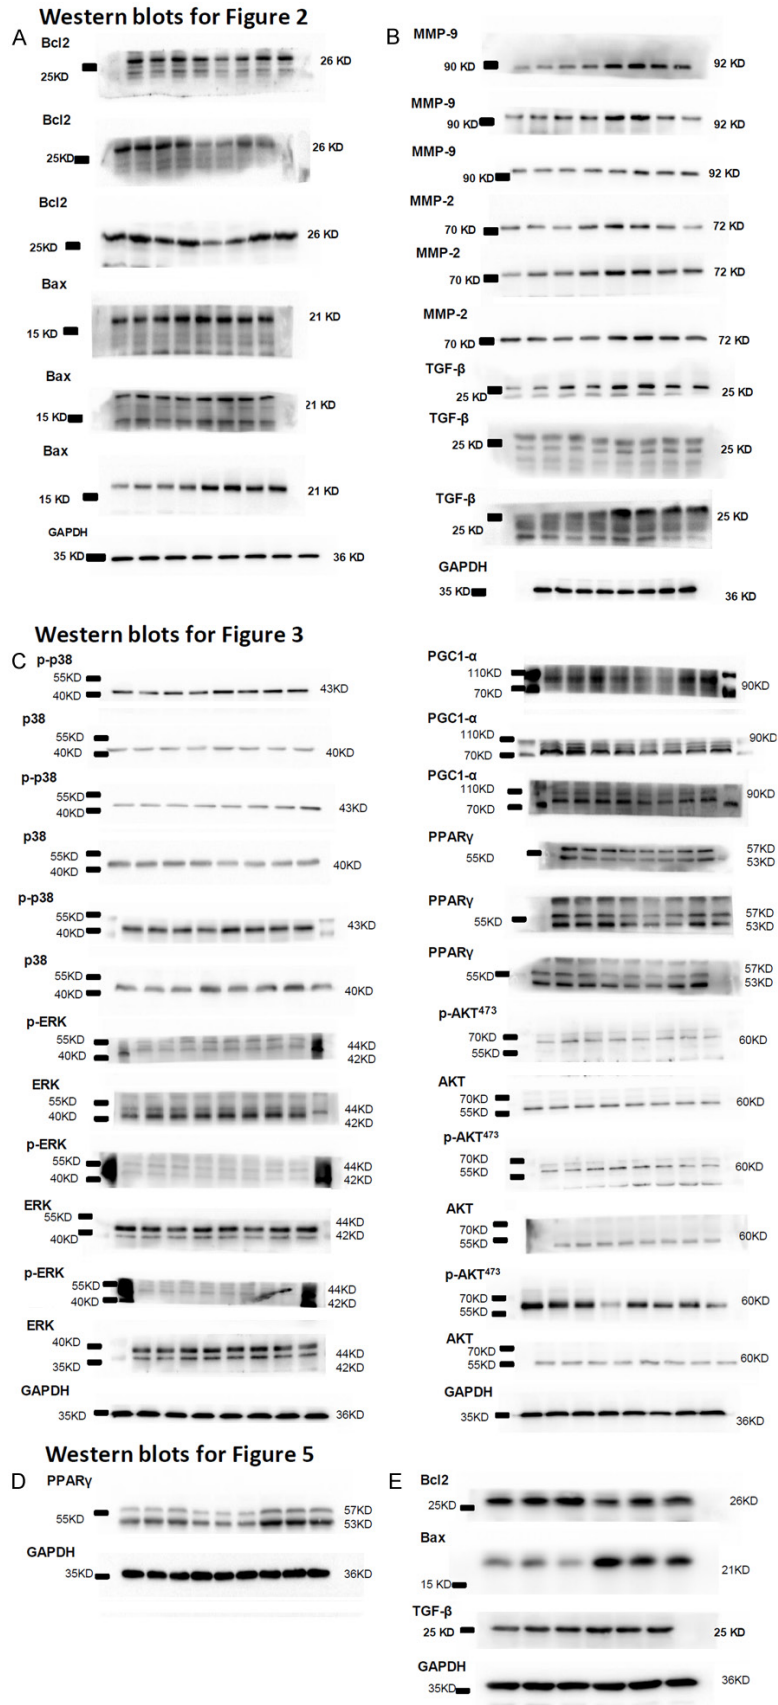

Supplementary Figure 1. Uncropped scans of Western blots for all relevant western bands.
